# Supplementary material for: Comprehensive analysis of senescence-related genes and immune infiltration in intervertebral disc degeneration: a meta-data approach utilizing bulk and single-cell RNA sequencing data
Source: Front Mol Biosci. 2023 Dec 22;10:1296782. doi: 10.3389/fmolb.2023.1296782 (PMC10770860; doi:10.3389/fmolb.2023.1296782)
Supplement: Supplementary file 4 [file Table4.XLSX]

## Sheet: KEGG_risk
ID	Description	GeneRatio	BgRatio	pvalue	p.adjust	qvalue	geneID	Count
hsa05022	Pathways of neurodegeneration - multiple diseases	96/1172	476/8378	8.54413e-05	0.00213997	0.00157142	637/5708/7846/5532/3064/1616/823/5717/5289/7132/5685/10121/4720/6311/27429/7317/5533/5719/10010/9246/29110/369/5705/83447/7419/506/11047/5894/596/5709/4728/5682/5707/8325/55062/7327/81029/2475/4726/572/84617/7474/5691/64837/65018/10376/8678/5704/10280/50507/5714/5690/356/3569/7384/5692/3799/2882/22926/5601/10975/581/10540/7186/5688/26100/3709/5710/374291/5530/1649/5630/4701/5701/5602/7802/627/133…	96
hsa05014	Amyotrophic lateral sclerosis	80/1172	364/8378	1.55885e-05	0.000867762	0.000637216	637/5708/7846/5532/1616/5717/5289/7132/5685/10121/4720/6311/5533/5719/10010/2733/29110/5705/310/506/11047/23636/596/5709/4728/10762/5682/5707/55062/2475/4726/4686/572/84617/5691/64837/65018/10376/8678/5704/10280/4927/5714/5690/7384/5692/3799/2882/22926/55706/10975/581/10540/7186/5688/71/26100/5710/374291/5530/1649/5630/8480/4701/6432/5701/7802/1339/81631/23279/5903/29796/11258/4717/4694/9451/4711…	80
hsa05010	Alzheimer disease	80/1172	384/8378	0.00011088	0.00246892	0.00181298	637/5708/7846/5532/823/5717/5289/7132/207/5685/4720/5533/5719/1147/369/5705/83447/7419/6868/506/11047/5894/5709/4728/5682/5707/8325/55062/81029/2475/4726/572/84617/4311/7474/5691/64837/10376/8678/5704/50507/5714/5690/3569/7384/5692/3799/22926/5601/10975/5610/7186/5688/10000/26100/4891/3709/5710/374291/5530/1649/4701/5701/5602/1339/355/29796/1459/801/4717/7855/10297/291/4694/9451/4711/7280/6622/74…	80
hsa05165	Human papillomavirus infection	72/1172	331/8378	5.91949e-05	0.00179737	0.00131985	3371/5925/23352/3685/3693/7132/1739/207/3066/5159/1021/90993/1147/8717/1282/29110/4854/1284/7187/8992/5747/9794/55012/3443/3678/5894/3454/8325/81029/3455/7283/2475/572/3915/5519/7474/3439/6773/2033/1278/2885/7450/5728/356/1277/6654/7297/6198/5610/581/6199/533/10312/3910/10000/6932/1298/5590/1299/4855/2308/5649/1280/355/9368/64398/7855/3918/10297/5521/7481/84612	72
hsa04151	PI3K-Akt signaling pathway	72/1172	354/8378	0.000508207	0.00709916	0.00521306	3371/7097/6794/7424/3685/1946/3566/3693/207/5562/5159/1021/9180/90993/1147/2791/1282/1284/5747/55012/3443/3678/5894/596/3454/3455/2475/572/3915/5519/3439/5585/1902/1278/2885/7450/7529/5728/356/1277/3569/1388/6654/11140/6198/6199/6850/5563/5156/3910/10000/2690/1298/10681/2261/1299/10018/1944/2246/4804/5649/627/1280/3570/1943/3164/3918/2788/2254/5521/9863/3326	72
hsa05016	Huntington disease	65/1172	306/8378	0.000274435	0.00436482	0.00320518	5708/7846/3064/5717/5289/5685/10121/3066/4720/5719/90993/5705/83447/7419/506/6874/11047/5709/4728/5682/5707/55062/2475/1175/4726/5434/84617/5691/64837/10376/8678/5704/161/2033/5714/5690/7384/5692/3799/2882/5601/10975/581/10540/7186/5435/5688/26100/5710/374291/4701/5432/5701/5602/7802/627/1339/29796/11258/4717/291/4694/4711/7280/5433	65
hsa04010	MAPK signaling pathway	64/1172	294/8378	0.000147688	0.00274043	0.00201236	51776/7042/9448/4615/7424/7048/5532/1946/6788/1616/7132/207/4763/5159/5533/6196/1147/8717/369/1846/5894/2316/3554/5321/784/2005/2885/929/356/25780/8569/6654/5601/22800/3654/5156/7186/10000/4215/57551/5530/1649/5801/9175/8649/2261/6885/5602/4616/4772/1944/2246/4804/3305/627/3306/2872/355/9254/1943/3164/2254/6195/1647	64
hsa05012	Parkinson disease	61/1172	266/8378	4.38198e-05	0.0016262	0.00119415	9817/5708/7846/1616/5717/5685/4720/27429/7317/5719/9246/4780/5705/83447/7419/7295/506/11047/5709/4728/5682/5707/7327/4726/84617/5691/64837/65018/10376/5704/5714/5690/7384/5692/3799/22926/5601/10975/581/5688/6571/4891/3709/5710/374291/1649/4701/5701/5602/2773/2774/1339/29796/801/4717/291/4694/9451/4711/7280/6622	61
hsa05132	Salmonella infection	60/1172	249/8378	1.03877e-05	0.000867762	0.000637216	9844/23191/7097/4615/7846/1778/5289/10787/7132/3576/10096/207/10121/23207/1147/8717/10095/10627/7295/5894/596/23265/8976/55770/79443/1783/9475/2316/84617/10109/64837/10376/5585/1785/63916/8737/929/3569/3799/5601/581/3654/10540/7186/10000/71/3836/837/6932/6281/6885/5602/7100/10006/6500/11258/10333/7280/3326/79026	60
hsa05020	Prion disease	58/1172	273/8378	0.00057386	0.00737189	0.00541334	5708/7846/5532/5717/5685/4720/5533/5719/90993/5705/83447/7419/506/11047/5709/4728/5682/5707/4726/572/3915/84617/5691/64837/10376/5704/5714/5690/3569/7384/5692/1388/3799/5601/10975/581/5688/857/3709/5710/374291/5530/1649/4701/5701/5602/4685/3305/1339/3306/29796/1459/4717/291/4694/9451/4711/7280	58
hsa05163	Human cytomegalovirus infection	53/1172	225/8378	6.50149e-05	0.00180958	0.00132881	5925/637/23365/3685/5532/2767/7132/115/3576/207/1871/1021/5533/90993/1147/4776/2791/8717/29110/5747/3443/5894/9475/2475/3554/3439/9826/8737/2885/112/356/6387/3569/1388/6654/6198/581/6199/5156/7186/10000/3709/5530/10681/108/2773/4772/3587/355/3570/801/2788/5733	53
hsa05131	Shigellosis	52/1172	247/8378	0.00134283	0.0140158	0.0102921	9844/4615/823/5289/7132/3576/10096/207/960/9181/1147/8717/3098/10095/29110/11335/10627/8936/5747/3678/596/8976/55062/9475/2475/10109/3554/8678/63916/8737/929/718/5601/6198/581/6199/7186/10000/71/837/26100/3709/58528/6885/664/5602/8290/7100/5333/2308/6500/81631	52
hsa05169	Epstein-Barr virus infection	51/1172	202/8378	1.22183e-05	0.000867762	0.000637216	5925/637/57506/7097/4615/5708/5717/207/3066/1871/1021/5719/960/1147/8717/29110/5705/7187/3443/11047/596/5709/5707/3454/3455/3439/5704/6773/5714/8737/3569/5601/7297/5610/581/3654/6850/915/7186/10000/5710/5701/6885/10018/5602/4616/3108/1643/355/1647/3627	51
hsa05130	Pathogenic Escherichia coli infection	48/1172	197/8378	5.83467e-05	0.00179737	0.00131985	23191/23365/4615/7846/7456/10787/7132/3576/10096/9181/1147/8440/8717/10095/8936/4691/8976/4430/9475/84617/10109/3554/9826/10376/1902/8737/356/3569/5601/581/3654/10061/10427/7186/5781/71/837/4629/6885/5010/5602/7100/10006/355/9076/9368/10458/7280	48
hsa05166	Human T-cell leukemia virus 1 infection	47/1172	222/8378	0.00198637	0.0174591	0.0128206	7042/5925/8295/6929/7048/5532/7132/115/1739/207/1871/5533/90993/1147/4776/996/83447/7419/8829/4316/4055/3554/2005/2033/112/5728/3569/1388/5601/8498/55697/581/915/10000/4215/5530/4801/108/5602/3108/4772/25906/8379/291/9184/4085/4488	47
hsa05170	Human immunodeficiency virus 1 infection	46/1172	212/8378	0.0013057	0.0140158	0.0102921	637/7097/4615/5532/2767/7132/207/5533/1147/8905/4776/2791/8717/29110/5747/3443/5894/596/2475/572/3439/8451/8737/356/5601/6198/581/6199/3654/915/7186/10000/3709/5530/10681/6885/5602/891/2773/85363/4772/6500/355/801/2788/56924	46
hsa04613	Neutrophil extracellular trap formation	44/1172	190/8378	0.00039441	0.00598786	0.00439701	7097/207/3066/83447/7419/9555/5894/2475/51564/55506/7450/2243/2215/718/6850/3146/8369/10000/71/837/8365/85236/8344/3012/55766/6885/8364/8339/8343/8349/3017/10014/8345/8360/8346/8290/8367/8348/8359/94239/2811/291/3018/8361	44
hsa05167	Kaposi sarcoma-associated herpesvirus infection	44/1172	194/8378	0.000632698	0.00782671	0.00574731	5925/637/5532/5289/7132/3576/207/1871/1021/5533/1147/4776/2791/8717/29110/7187/3443/5894/3454/3455/2475/3439/8678/6773/2033/3569/718/5601/7297/5610/581/6850/7186/10000/3709/5530/6932/10681/5602/4772/355/81631/801/2788	44
hsa05417	Lipid and atherosclerosis	44/1172	215/8378	0.00525713	0.0373592	0.0274336	637/7097/4615/5532/7132/3576/207/5533/10010/1147/4780/29110/7187/4318/5747/3443/596/9475/572/3439/929/356/3569/839/22926/5601/581/3654/7186/10000/5530/1649/9619/6885/25833/5602/4772/3305/3306/355/801/9451/10333/3326	44
hsa05034	Alcoholism	43/1172	187/8378	0.000535579	0.00715533	0.00525431	3066/90993/2791/369/9555/5894/5499/51564/55506/2885/10645/1388/6654/8369/6571/8365/85236/8344/3012/10681/55766/8364/8339/8343/8349/3017/10014/8345/8360/8346/8290/2773/8367/8348/5569/8359/627/94239/801/2030/2788/3018/8361	43
hsa04510	Focal adhesion	43/1172	203/8378	0.00299005	0.0235137	0.0172666	2909/3371/7424/3685/3693/207/55742/5159/23396/1282/10627/1284/5747/3678/5894/596/9475/2316/572/5499/3915/1278/2885/7450/5728/1277/6654/5601/5156/3910/10000/857/71/2889/1298/1299/4638/5602/5649/1280/91807/3918/56924	43
hsa04810	Regulation of actin cytoskeleton	43/1172	229/8378	0.0247932	0.103315	0.0758664	54434/2909/23191/3682/23365/3685/3693/10787/10096/207/5159/23396/1730/10095/10627/369/8936/5747/3678/5894/8976/4478/9475/5305/5499/10109/1902/2245/6387/6654/22800/5156/10000/71/4629/2261/4638/2246/91807/10297/2254/10458/56924	43
hsa05161	Hepatitis B	42/1172	162/8378	3.62105e-05	0.0016262	0.00119415	7042/5925/637/57506/7097/4615/7048/3576/207/1871/90993/1147/4776/29110/369/7187/7419/4318/3443/5894/596/3454/572/3439/6773/2033/2885/7529/356/3569/1388/6654/5601/7297/581/3654/10000/6885/5602/1643/4772/355	42
hsa05225	Hepatocellular carcinoma	42/1172	168/8378	8.96992e-05	0.00213997	0.00157142	7042/5925/9817/7048/55193/6597/207/1871/1021/6603/4780/7296/369/29117/5894/1728/8325/81029/2475/9446/8289/572/7474/6599/2885/5728/6654/6198/581/6199/6605/51412/10000/71/6932/2941/4616/1643/7855/10297/1647/7481	42
hsa05203	Viral carcinogenesis	42/1172	204/8378	0.00565269	0.0385306	0.0282938	5925/23352/1739/3066/1021/90993/8717/7187/7419/572/51564/4055/2033/2968/2885/7529/718/1388/55697/5610/581/6850/7186/8369/8365/85236/8344/8364/8339/8343/8349/3017/10014/8345/8360/8346/8367/8348/8359/8379/3018/8361	42
hsa05208	Chemical carcinogenesis - reactive oxygen species	42/1172	223/8378	0.0251153	0.103315	0.0758664	8644/1645/1545/9817/1646/207/4720/1147/4780/369/83447/7419/5747/506/23683/5894/4728/196/1728/9446/4726/572/50507/2885/5728/7384/6654/5601/10975/10000/5781/374291/2941/2053/4701/5602/1339/29796/4717/291/4694/4711	42
hsa04714	Thermogenesis	42/1172	232/8378	0.0447291	0.154016	0.113097	6597/28958/115/5562/4720/6603/6196/90993/506/4728/2475/4726/8289/6599/2885/112/7384/6654/1374/6198/10975/6199/5563/25915/6605/51412/71/374291/4701/108/55744/2180/2181/1339/29796/55471/1355/4717/6195/4694/4711/55818	42
hsa05205	Proteoglycans in cancer	41/1172	205/8378	0.0102593	0.0565737	0.0415433	7042/23365/7097/3685/288/867/3693/207/4313/960/369/4318/5747/3678/5894/4478/8325/81029/9475/2475/2316/5499/7474/1278/2885/7291/356/1277/6654/22800/6198/6199/10000/5781/857/71/3709/355/3316/7855/7481	41
hsa04144	Endocytosis	41/1172	251/8378	0.159574	0.372058	0.27321	832/11031/7048/7456/867/10096/1601/80230/10254/91782/23396/830/10095/57403/2060/11021/8976/868/64411/11059/5119/1175/27183/10109/1785/161/23527/79643/3799/30844/3482/5156/8723/857/80223/5590/2261/3305/3306/27131/84612	41
hsa04936	Alcoholic liver disease	40/1172	142/8378	6.65388e-06	0.000867762	0.000637216	4615/79966/7132/3576/207/5562/1147/8717/29110/7187/3443/5465/125/3439/50507/8737/929/356/10645/84818/3569/718/23765/5601/1374/224/34/3654/5563/10000/6932/6720/6885/5602/223/2308/355/23175/29896/501	40
hsa05152	Tuberculosis	40/1172	180/8378	0.00164857	0.0157902	0.0115951	7042/637/23365/7097/4615/1520/5532/5289/7132/207/2207/5533/8717/3443/5894/596/572/3439/2033/929/3569/2215/718/5601/581/533/3654/6850/10312/10000/5530/4801/1594/5602/3108/3586/5994/3587/801/10333	40
hsa04360	Axon guidance	40/1172	182/8378	0.00204672	0.0175284	0.0128714	54434/23365/2051/22885/5532/1946/659/5533/23380/2042/4776/8440/10627/5747/9723/9423/5894/8829/10512/81029/9475/6259/7474/9037/6387/10371/5781/5530/2049/1948/5590/2773/3983/1944/2047/64221/1943/5998/56924/84612	40
hsa05160	Hepatitis C	39/1172	157/8378	0.000182715	0.00321194	0.00235859	5925/637/57506/7132/207/1871/1021/1147/8717/29110/8837/369/7187/10197/3443/5894/5465/3454/3455/572/5519/3439/6773/8737/2885/7529/356/6654/7297/5610/581/7186/10000/5010/355/9076/5521/3627/9451	39
hsa04217	Necroptosis	39/1172	159/8378	0.000242348	0.00404721	0.00297195	637/823/7132/27005/91782/8717/8837/83447/7419/9555/3443/2512/596/3454/5119/3455/27183/3439/5321/6773/55506/8737/356/79643/5601/7297/5610/581/3146/7186/9131/3012/5478/55766/5602/94239/355/291/3326	39
hsa04210	Apoptosis	38/1172	136/8378	1.38106e-05	0.000867762	0.000637216	637/7846/1520/1616/823/7132/207/27429/1147/8717/8837/5894/596/572/10376/835/1522/8737/356/839/5601/581/7186/9131/10000/71/1677/3709/1649/56616/10018/5602/8739/4616/10038/355/1647/9451	38
hsa04530	Tight junction	38/1172	169/8378	0.00170194	0.0157902	0.0115951	7846/6794/912/8777/1739/10096/5562/9181/57826/10095/10627/83700/51762/4478/9475/8189/5519/10109/10376/4771/55114/4637/5601/9414/5563/23370/71/4629/5590/5010/5602/154796/11346/9076/9368/64398/5521/84612	38
hsa04060	Cytokine-cytokine receptor interaction	38/1172	295/8378	0.736464	0.881645	0.64741	7042/7048/657/3566/7132/3576/659/9180/650/3443/4982/3454/3455/6355/8809/4055/3554/3439/3977/356/84818/6387/3569/23765/5197/2690/2661/27190/3590/27242/3586/4804/2826/3587/355/3570/943/3627	38
hsa04014	Ras signaling pathway	37/1172	236/8378	0.249642	0.505291	0.371046	7424/1946/207/4763/8036/5159/1147/2791/29110/57148/5894/55770/572/5321/2885/356/25780/6654/5601/22800/5156/5320/10000/5781/10681/2261/5602/1944/2246/4804/627/801/81579/1943/2788/2254/56924	37
hsa05162	Measles	36/1172	139/8378	0.000130889	0.00257159	0.00188837	637/57506/7097/4615/207/1021/1147/8717/29110/7187/3443/596/4478/868/3454/3455/572/3439/6773/356/3569/5601/7297/5610/581/3654/915/10000/25898/6885/5602/3305/3306/355/1459/9451	36
hsa05415	Diabetic cardiomyopathy	35/1172	203/8378	0.107688	0.288021	0.2115	7042/7048/2936/207/4313/4720/83447/7419/4318/506/4728/5465/2475/4726/5499/5166/1278/5728/1277/7384/5601/10975/2539/10000/374291/4701/5590/5602/51660/1339/29796/4717/291/4694/4711	35
hsa05206	MicroRNAs in cancer	35/1172	310/8378	0.933769	0.984462	0.722911	7042/3371/4363/1545/9839/1946/659/3066/1871/5159/1021/960/8434/4854/4318/3678/5894/596/2475/2033/2885/5728/6654/5156/2261/4855/10018/10014/1944/4194/23414/1943/10297/27165/8651	35
hsa05017	Spinocerebellar ataxia	34/1172	143/8378	0.00106927	0.0123151	0.00904322	5708/23369/5717/5289/207/5685/6311/5719/5705/83447/7419/11047/5709/5682/5707/55062/2475/5691/8678/5704/5714/5690/5692/5601/7186/5688/10000/26100/3709/5710/5701/5602/5649/291	34
hsa04110	Cell cycle	34/1172	157/8378	0.00544029	0.0378554	0.027798	7042/5925/5591/8243/3066/1871/1021/10274/9088/996/23244/5519/7027/2033/23383/7529/4999/1875/9212/4171/891/4616/23594/25906/6500/8379/1028/9184/1647/1022/2810/5000/23595/4085	34
hsa04141	Protein processing in endoplasmic reticulum	34/1172	171/8378	0.0198101	0.0882208	0.0647823	55768/55666/823/10273/54788/10970/54431/80267/4121/4780/23193/596/55741/7327/6184/5886/1388/267/22926/5601/9532/5610/581/10427/7186/1649/22824/10483/5602/3305/3306/6500/9451/3326	34
hsa05164	Influenza A	34/1172	171/8378	0.0198101	0.0882208	0.0647823	637/57506/4615/7132/3576/207/1021/1147/8717/29110/7187/83447/3443/5894/3454/3455/3439/6773/2033/3838/356/3569/23633/7297/5610/581/10000/71/3836/8480/3108/355/291/3627	34
hsa05202	Transcriptional misregulation in cancer	34/1172	193/8378	0.0889517	0.251778	0.184886	4298/5218/6929/9611/7048/3576/3066/6760/1025/3486/4318/5747/7468/3206/2120/4286/2005/929/3569/581/1649/8013/8864/26039/4291/4616/8290/1643/4804/2308/5087/221037/5077/1647	34
hsa05171	Coronavirus disease - COVID-19	34/1172	232/8378	0.412353	0.666373	0.489332	57506/7097/4615/7132/3576/715/1147/9349/29110/7187/6868/3443/8829/3454/3455/3439/716/6773/7450/3569/2243/718/5601/7297/5610/3654/6850/1675/6885/5602/3570/6138/3627/6135	34
hsa04140	Autophagy - animal	33/1172	141/8378	0.00166699	0.0157902	0.0115951	6794/5289/207/5562/10010/29110/8837/5894/596/55062/2475/572/9711/8678/5728/10645/5601/22800/6198/6199/5563/3146/10000/26100/58528/6885/664/5602/64798/3476/81631/83452/9451	33
hsa04932	Non-alcoholic fatty liver disease	33/1172	155/8378	0.00796721	0.0502084	0.0368691	637/7132/3576/207/5562/4720/4728/5465/4726/356/3569/7384/5601/10975/581/6945/5563/7186/10000/374291/1649/6720/4701/10018/5602/1339/355/29796/3570/4717/4694/9451/4711	33
hsa04218	Cellular senescence	33/1172	156/8378	0.00878966	0.0517946	0.0380339	28996/7042/5925/7048/5532/823/3576/207/1871/1021/5533/4776/3486/83447/7419/5894/2475/5499/5728/3569/22800/1875/10000/3709/5530/891/4616/4772/2308/801/5883/291/1647	33
hsa05207	Chemical carcinogenesis - receptor activation	33/1172	212/8378	0.279096	0.535736	0.393402	5925/1545/3837/115/207/6196/90993/5894/596/196/5465/2475/9446/572/3838/2885/112/1388/6654/23633/6198/6199/9970/10000/3836/2941/2053/108/2773/153/2254/6195/3326	33
hsa04150	mTOR signaling pathway	32/1172	156/8378	0.0152184	0.071591	0.0525707	6794/92335/7132/207/5562/6196/1147/55615/6249/5894/8325/81029/2475/51719/7474/2885/5728/2887/6654/6198/6199/5563/10000/28956/79899/58528/8649/64798/23175/7855/6195/7481	32
hsa04390	Hippo signaling pathway	32/1172	157/8378	0.016636	0.0771726	0.0566695	7042/7048/657/6788/1739/659/650/8325/81029/5499/5519/7474/4771/7159/7529/10413/25937/55233/71/60485/6932/5590/154796/2246/2736/64398/7855/7003/10297/5521/7481/84612	32
hsa04024	cAMP signaling pathway	32/1172	225/8378	0.489216	0.726214	0.533274	115/207/90993/10257/5894/5465/483/64411/5142/9475/572/5499/2737/134/2033/112/5601/22800/2492/10000/64208/108/6751/5602/4886/117/2773/4772/153/627/801/5733	32
hsa05135	Yersinia infection	31/1172	137/8378	0.00392935	0.0291645	0.0214161	9844/23365/4615/7456/3576/10096/207/23396/6196/1147/10095/29110/5747/3678/8976/9475/10109/5585/63916/3569/5601/3654/7186/10000/71/6885/5602/4772/3586/6195/10458	31
hsa04120	Ubiquitin mediated proteolysis	31/1172	142/8378	0.00684195	0.044808	0.0329035	9817/51588/10054/867/4281/8924/10273/7317/9320/9039/65264/9246/23295/996/868/11059/7327/3093/8451/9690/26091/27339/997/25898/1643/7320/25906/6500/11060/79444/8651	31
hsa04630	JAK-STAT signaling pathway	31/1172	166/8378	0.0539962	0.173411	0.127339	51588/3566/207/5159/9180/10254/3443/5894/596/3454/3455/2475/3439/3977/6773/2033/2885/3569/6654/7297/5156/10000/5781/2690/3590/2273/3586/3587/3570/1154/8651	31
hsa04022	cGMP-PKG signaling pathway	31/1172	167/8378	0.0577882	0.182087	0.133711	5532/2767/115/207/5533/90993/4776/83447/7419/5894/483/9475/572/5499/134/112/1388/2982/2983/10000/3709/5530/27345/108/4638/2773/4772/153/801/91807/291	31
hsa04910	Insulin signaling pathway	30/1172	137/8378	0.00738205	0.0474155	0.0348182	867/207/5562/3098/369/5894/23265/868/2475/572/5499/2885/8569/6654/5601/6198/6199/5563/10000/2889/6720/5590/5602/10580/2308/2872/3632/801/23433/8651	30
hsa05418	Fluid shear stress and atherosclerosis	30/1172	139/8378	0.00910925	0.0524567	0.0385201	9817/51588/3685/657/7132/207/5562/4313/659/9181/1147/4780/4318/5747/7295/596/1728/9446/3554/5601/5563/10000/857/71/2941/5590/6885/5602/801/3326	30
hsa05224	Breast cancer	30/1172	147/8378	0.0196252	0.0882208	0.0647823	5925/207/1871/1021/4854/369/8202/5894/8325/81029/2475/8648/7474/2885/5728/6654/6198/581/6199/10000/6932/4855/4616/1643/2246/7855/10297/2254/1647/7481	30
hsa05226	Gastric cancer	30/1172	149/8378	0.0233722	0.100081	0.0734915	7042/5925/7048/207/1871/369/5894/596/8325/81029/2475/7474/5915/2885/6654/6198/581/6199/10000/1045/6932/4616/1643/2246/7855/10297/2254/4292/1647/7481	30
hsa01240	Biosynthesis of cofactors	30/1172	153/8378	0.0325244	0.124548	0.0914579	211/51727/2937/4522/8942/65220/7358/1728/1371/586/2730/23475/441024/55191/80347/224/159/10201/2677/11019/5372/9249/8836/587/1355/53630/51601/210/51805/205	30
hsa04310	Wnt signaling pathway	30/1172	170/8378	0.103124	0.282324	0.207316	5532/2239/5533/4776/64840/8325/4316/81029/9475/6259/7474/57680/1487/2033/5601/5530/6932/6885/5602/4772/11197/6500/1459/25776/1501/25805/7855/7088/10297/7481	30
hsa05322	Systemic lupus erythematosus	29/1172	136/8378	0.0120779	0.0620617	0.0455732	715/9555/716/55506/2215/718/8369/8365/85236/8344/3012/55766/8364/8339/8343/8349/3017/8345/8360/8346/8290/3108/8367/8348/8359/3586/94239/3018/8361	29
hsa04621	NOD-like receptor signaling pathway	29/1172	186/8378	0.291944	0.544746	0.400018	57506/4615/3576/10010/1147/29110/7187/7419/7295/3443/596/3454/3455/3439/5585/6773/22900/8737/3569/5601/7297/2634/7186/837/3709/6885/5602/81631/3326	29
hsa04015	Rap1 signaling pathway	29/1172	210/8378	0.561258	0.787648	0.578386	7424/1946/115/207/5159/23683/5894/64411/54518/1902/112/25780/5156/10000/71/2889/26037/5590/2261/108/2773/1944/2246/4804/801/1943/2254/9863/84612	29
hsa04020	Calcium signaling pathway	29/1172	240/8378	0.830645	0.943658	0.692948	7424/5532/2767/115/5159/5533/83447/7419/444/2668/80228/5156/3709/5530/2261/108/4638/3269/153/55283/5333/2246/4486/2774/801/91807/2254/291/5733	29
hsa01522	Endocrine resistance	28/1172	98/8378	0.000119654	0.00249777	0.00183416	5925/9611/115/207/4313/1871/10498/4854/369/8202/4318/5747/5894/596/2475/572/2885/112/6654/5601/6198/581/6199/10000/4855/108/5602/2852	28
hsa04380	Osteoclast differentiation	28/1172	128/8378	0.00956828	0.0541662	0.0397754	7042/7048/5532/7132/207/5533/1147/7305/4982/3454/3455/3554/4286/6773/2885/2215/5601/7297/6850/7186/10000/55423/5530/6885/5602/4772/353514/8651	28
hsa04071	Sphingolipid signaling pathway	27/1172	121/8378	0.00827786	0.0512001	0.0375973	637/4363/7132/207/8439/2207/8717/8560/55012/5894/596/9475/5519/29956/134/5728/5601/259230/581/7186/10000/5590/5602/2773/253782/5521/171546	27
hsa04611	Platelet activation	27/1172	124/8378	0.0114965	0.0609498	0.0447567	2909/23365/115/207/2207/10627/9475/54518/5499/5321/1278/7450/112/1277/2243/2982/2983/6850/10000/71/3709/5590/108/4638/2773/91807/2811	27
hsa04068	FoxO signaling pathway	27/1172	131/8378	0.0229924	0.0997334	0.0732363	7042/6794/7048/207/5562/1147/369/3276/5894/2033/2885/5728/356/3569/6654/5601/5563/10000/10018/664/5602/891/4616/901/3586/2308/1647	27
hsa04722	Neurotrophin signaling pathway	26/1172	119/8378	0.0124197	0.0625091	0.0459017	207/6196/5894/596/572/11213/10019/2885/356/6654/5601/397/581/3654/396/10000/5781/2889/4215/5602/4804/627/801/27018/10782/6195	26
hsa04926	Relaxin signaling pathway	26/1172	129/8378	0.0327163	0.124548	0.0914579	7424/7048/115/207/4313/90993/2791/1282/1284/4318/5894/1278/2885/112/1277/1388/6654/5601/10000/6019/10681/5590/108/5602/2773/2788	26
hsa04270	Vascular smooth muscle contraction	26/1172	134/8378	0.0494355	0.164692	0.120937	23365/2767/115/369/5894/72/9475/5499/9826/5321/112/4637/2982/2983/5320/3709/4629/27345/5583/796/108/4638/133/801/91807/81579	26
hsa04921	Oxytocin signaling pathway	26/1172	154/8378	0.175584	0.391269	0.287317	5532/115/5562/5533/4776/5894/9475/5499/5321/784/112/4637/10645/2982/2983/5563/71/3709/5530/108/4638/2773/4772/9254/801/91807	26
hsa05142	Chagas disease	25/1172	102/8378	0.00302721	0.0235137	0.0172666	7042/7097/4615/7048/2767/7132/3576/207/1147/8837/5519/356/3569/718/5601/3654/915/10000/5602/2773/3586/2774/355/5521/10333	25
hsa03013	Nucleocytoplasmic transport	25/1172	108/8378	0.00668802	0.044676	0.0328065	8563/3837/3842/2733/3843/55705/23636/23214/10762/4686/10527/4927/3838/30000/5905/23633/55706/9670/3836/8480/5411/9775/9939/23279/5903	25
hsa05145	Toxoplasmosis	25/1172	112/8378	0.0107432	0.0578748	0.0424987	7042/7097/4615/7132/207/1147/596/572/3915/5601/7297/3654/3910/10000/6885/5602/3108/2773/3586/3305/3306/3587/79444/3918/8651	25
hsa04371	Apelin signaling pathway	25/1172	139/8378	0.108655	0.288021	0.2115	5289/115/207/5562/2791/4854/5894/2475/8678/112/22800/6198/6199/5563/10000/3709/10681/108/4638/10014/2773/81631/801/91807/2788	25
hsa03040	Spliceosome	25/1172	156/8378	0.261045	0.518981	0.381099	9785/9416/11017/9879/4686/26121/27339/22827/6625/6432/6431/25949/6426/9775/9716/9939/9128/6430/3305/3306/6635/29896/6629/6626/6428	25
hsa04062	Chemokine signaling pathway	25/1172	192/8378	0.683645	0.845694	0.621011	9844/115/3576/207/1147/2791/5747/5894/9475/6355/572/6773/2885/112/6387/6654/10000/5197/10681/5590/108/2773/2826/2788/3627	25
hsa04080	Neuroactive ligand-receptor interaction	25/1172	367/8378	0.999997	1	0.734321	4828/1902/134/2559/718/7068/1142/2492/2690/6019/796/6751/4886/10424/117/3269/1241/153/133/2558/885/3375/79957/2566/5733	25
hsa05222	Small cell lung cancer	24/1172	92/8378	0.00148343	0.0150141	0.0110252	5925/3685/207/1871/1021/1147/1282/1284/7187/5747/596/3915/5915/5728/581/7186/3910/10000/4616/1643/79444/2272/3918/1647	24
hsa04919	Thyroid hormone signaling pathway	24/1172	121/8378	0.0460538	0.156959	0.115258	9611/3685/207/3066/4854/8202/9442/5211/5894/483/29079/2475/9968/572/8648/2033/9862/7068/9282/10000/71/4855/5333/2308	24
hsa04650	Natural killer cell mediated cytotoxicity	24/1172	132/8378	0.104097	0.282671	0.207571	637/5532/2207/5533/7305/369/3443/5894/3454/3455/3439/2885/356/2215/6654/6850/3824/5781/5530/80328/4772/80329/355/7462	24
hsa04915	Estrogen signaling pathway	24/1172	138/8378	0.14979	0.369149	0.271074	115/207/4313/90993/8202/4318/5894/596/8648/2885/112/1388/6654/10000/3709/108/2773/2852/3305/3306/801/9166/25984/3326	24
hsa04934	Cushing syndrome	24/1172	155/8378	0.327569	0.575832	0.422845	5925/2767/115/1871/1021/90993/5151/8085/196/8325/81029/7474/112/1388/3709/6932/108/54554/2773/5087/7855/3164/10297/7481	24
hsa04814	Motor proteins	24/1172	193/8378	0.765271	0.896413	0.658255	832/7846/1778/10121/830/10627/4650/72/4430/1783/7283/84617/64837/10376/4637/3799/10540/71/4629/7802/70/51174/11258/7280	24
hsa05210	Colorectal cancer	23/1172	86/8378	0.0012868	0.0140158	0.0102921	7042/7048/207/369/5894/596/2475/572/2885/6654/5601/6198/581/6199/10000/6932/10018/5602/4616/1643/10297/4292/1647	23
hsa04931	Insulin resistance	23/1172	108/8378	0.0239351	0.101194	0.0743089	7132/207/5562/6196/90993/5465/2475/5499/5728/3569/5601/1374/6198/6199/6945/5563/10000/5781/6720/5590/5602/2308/6195	23
hsa04728	Dopaminergic synapse	23/1172	132/8378	0.153718	0.372042	0.273198	9575/5532/207/5533/90993/2791/55012/5499/5519/1388/3799/5601/10000/6571/3709/5530/10681/5602/2773/2774/801/2788/5521	23
hsa04072	Phospholipase D signaling pathway	23/1172	148/8378	0.325692	0.575832	0.422845	56894/115/3576/207/5159/2207/23396/5894/2475/5321/1902/1785/2885/112/1606/6654/22800/6850/1609/5156/10000/5781/108	23
hsa05220	Chronic myeloid leukemia	22/1172	76/8378	0.000510119	0.00709916	0.00521306	7042/5925/7048/867/207/3066/1871/1021/1147/369/5894/613/572/1487/2885/6654/581/10000/5781/4616/1643/1647	22
hsa04064	NF-kappa B signaling pathway	22/1172	104/8378	0.0287419	0.112939	0.0829332	4615/51588/7132/3576/1147/8717/8837/7187/596/29775/4055/3554/8737/929/6387/3654/6850/7186/6885/4616/1459/1647	22
hsa04620	Toll-like receptor signaling pathway	22/1172	104/8378	0.0287419	0.112939	0.0829332	7097/4615/3576/207/1147/29110/7187/3443/3454/3455/3439/8737/929/3569/5601/3654/10000/6885/5602/7100/3627/10333	22
hsa04625	C-type lectin receptor signaling pathway	22/1172	104/8378	0.0287419	0.112939	0.0829332	23365/5532/207/2207/5533/1147/4776/5894/868/6773/3569/5601/22800/6850/10000/5781/3709/5530/5602/4772/3586/801	22
hsa04935	Growth hormone synthesis, secretion and action	22/1172	120/8378	0.10831	0.288021	0.2115	2767/115/207/90993/3486/5747/5894/2475/2033/2885/112/1388/6654/5601/10000/3709/2690/108/6751/5602/2773/8651	22
hsa04152	AMPK signaling pathway	22/1172	121/8378	0.115784	0.299781	0.220136	6794/79966/92335/207/5562/90993/55012/5211/23216/2475/5519/51719/10645/1374/6198/6199/5563/10000/6720/6885/2308/5521	22
hsa04723	Retrograde endocannabinoid signaling	22/1172	148/8378	0.414106	0.666373	0.489332	115/4720/2791/4728/4726/112/2559/5601/747/3709/374291/10681/4701/108/5602/2773/2558/4717/2566/2788/4694/4711	22
hsa04145	Phagosome	22/1172	152/8378	0.466859	0.708777	0.52047	7097/7846/1520/3685/1778/5289/3693/715/8992/3678/1783/84617/10376/929/2215/718/533/10312/71/3108/10333/7280	22
hsa05215	Prostate cancer	21/1172	97/8378	0.0253648	0.103315	0.0758664	5925/207/1871/5159/90993/1147/369/4318/5894/596/2475/572/2033/2885/5728/6654/5156/10000/6932/2308/3326	21
hsa04933	AGE-RAGE signaling pathway in diabetic complications	21/1172	100/8378	0.0345084	0.126657	0.0930071	7042/7424/7048/3576/207/4313/1282/1284/596/1278/50507/1277/3569/5601/581/10000/5590/5602/4772/5333/2308	21
hsa04114	Oocyte meiosis	21/1172	131/8378	0.283536	0.541149	0.397377	5532/8243/115/5533/6196/9088/996/5499/5519/7529/112/3709/5530/108/891/25906/6500/8379/801/6195/4085	21
hsa04142	Lysosome	21/1172	132/8378	0.295983	0.548056	0.402449	1520/26088/9179/8905/23431/23312/411/1522/9583/2717/3988/533/3482/10312/4891/3373/4126/4758/1200/23457/5538	21
hsa04550	Signaling pathways regulating pluripotency of stem cells	21/1172	143/8378	0.441037	0.685479	0.503362	6929/657/207/659/3720/5894/8325/81029/10336/7474/3977/2885/10000/6932/2261/7855/10297/4090/7481/10637/3211	21
hsa03050	Proteasome	20/1172	46/8378	1.0481e-06	0.000350064	0.00025706	5708/5717/5685/5719/5705/10197/11047/5709/5682/5707/5691/5720/5704/5714/5690/5692/5699/5688/5710/5701	20
hsa04115	p53 signaling pathway	20/1172	73/8378	0.00189874	0.0171399	0.0125862	637/1021/9538/3486/596/64393/5728/581/25898/891/56475/4616/901/1643/27244/4194/64065/355/1647/2810	20
hsa05212	Pancreatic cancer	20/1172	76/8378	0.00318767	0.0241973	0.0177686	7042/5925/7048/207/1871/1021/1147/369/5894/2475/572/5601/6198/581/6199/10000/5602/4616/1643/1647	20
hsa01521	EGFR tyrosine kinase inhibitor resistance	20/1172	79/8378	0.00513754	0.037303	0.0273924	207/4763/5159/369/5894/596/2475/572/2885/5728/3569/6654/6198/581/6199/5156/10000/2261/10018/3570	20
hsa04914	Progesterone-mediated oocyte maturation	20/1172	102/8378	0.0710348	0.219682	0.161317	115/207/6196/9088/369/996/5894/6793/112/5601/10000/108/5602/891/2773/25906/8379/6195/4085/3326	20
hsa04668	TNF signaling pathway	20/1172	114/8378	0.166222	0.382884	0.28116	7424/7132/207/90993/1147/8717/8837/7187/4318/8809/8737/3569/1388/5601/7186/10000/6885/5602/355/3627	20
hsa00230	Purine metabolism	20/1172	128/8378	0.332154	0.578123	0.424528	115/132/5151/4907/51020/5142/112/271/9583/2982/159/10201/124583/2983/108/5471/2272/51292/205/1716	20
hsa04261	Adrenergic signaling in cardiomyocytes	20/1172	154/8378	0.676381	0.8407	0.617344	115/207/90993/55012/596/483/5499/5519/784/112/1388/10000/64208/108/2773/153/70/9254/801/5521	20
hsa04920	Adipocytokine signaling pathway	19/1172	69/8378	0.00228946	0.0186507	0.0136956	6794/7132/207/5562/1147/8717/5465/2475/10645/5601/1374/5563/7186/10000/5781/5602/2180/2181/23205	19
hsa04512	ECM-receptor interaction	19/1172	88/8378	0.0331878	0.124548	0.0914579	3371/3685/3693/960/1282/1284/9900/3678/3915/1278/7450/1277/3910/1298/1299/5649/1280/2811/3918	19
hsa04540	Gap junction	19/1172	88/8378	0.0331878	0.124548	0.0914579	7846/2767/115/5159/5894/84617/10376/1902/2885/112/6654/2982/2983/5156/3709/108/2773/153/7280	19
hsa04211	Longevity regulating pathway	19/1172	89/8378	0.0368715	0.13242	0.097239	79813/6794/115/207/5562/90993/10919/2475/112/10645/1388/6198/581/6199/5563/10000/108/27244/2308	19
hsa05235	PD-L1 expression and PD-1 checkpoint pathway in cancer	19/1172	89/8378	0.0368715	0.13242	0.097239	7097/4615/5532/207/5533/1147/5894/2475/5728/238/6198/6199/915/10000/5781/4215/5530/4772/1459	19
hsa04070	Phosphatidylinositol signaling system	19/1172	97/8378	0.077669	0.229464	0.168501	5289/23396/8821/8776/5298/5305/56623/4952/5728/1606/8867/1609/22908/3709/9807/5333/3632/801/1040	19
hsa04350	TGF-beta signaling pathway	19/1172	98/8378	0.0843089	0.242751	0.178257	7042/7048/657/4052/659/2200/650/5519/7027/2033/6198/1875/6199/2014/6500/2331/25805/4090/10637	19
hsa05146	Amoebiasis	19/1172	102/8378	0.114503	0.298782	0.219402	7042/7097/912/2767/3576/1282/1284/5747/3915/3554/1278/929/1277/3569/5052/3910/3586/2774/3918	19
hsa04660	T cell receptor signaling pathway	19/1172	104/8378	0.131791	0.336018	0.246745	5532/1739/207/5533/1147/8440/5894/868/2885/6654/5601/915/10000/5530/6885/5602/4772/3586/56924	19
hsa04922	Glucagon signaling pathway	19/1172	107/8378	0.160408	0.372058	0.27321	5532/207/5562/5533/90993/3276/5211/5465/5531/2033/1374/5563/10000/3709/5530/108/5224/2308/801	19
hsa04659	Th17 cell differentiation	19/1172	108/8378	0.170642	0.387717	0.284708	7048/5532/3566/5533/1147/196/2475/3554/3569/5601/7297/915/5530/6097/5602/3108/4772/3570/3326	19
hsa00280	Valine, leucine and isoleucine degradation	18/1172	48/8378	4.20215e-05	0.0016262	0.00119415	5095/586/35/224/27034/34/3032/65985/4594/18/38/4329/223/587/3155/501/56922/594	18
hsa05218	Melanoma	18/1172	72/8378	0.00883921	0.0517946	0.0380339	5925/207/1871/5159/1021/369/5894/572/4286/5728/581/5156/10000/4616/1643/2246/2254/1647	18
hsa05223	Non-small cell lung cancer	18/1172	72/8378	0.00883921	0.0517946	0.0380339	5925/207/1871/1021/369/5894/572/5915/2885/238/6654/3799/581/10000/4616/1643/2272/1647	18
hsa05214	Glioma	18/1172	75/8378	0.0135745	0.0666748	0.0489607	5925/207/1871/5159/1021/369/5894/2475/2885/5728/6654/581/5156/10000/4616/1643/801/1647	18
hsa03015	mRNA surveillance pathway	18/1172	97/8378	0.125316	0.321966	0.236426	2733/2935/55012/4686/5499/8189/26528/5519/29894/23708/64895/5411/9775/9939/55339/1479/56903/5521	18
hsa04974	Protein digestion and absorption	18/1172	103/8378	0.186252	0.409263	0.300531	1803/50509/1282/1284/1306/483/4311/6510/6505/1278/1277/206358/1298/1299/1302/6519/1280/7512	18
hsa04012	ErbB signaling pathway	17/1172	85/8378	0.0783202	0.229464	0.168501	867/207/8440/369/5747/5894/868/2475/572/2885/6654/5601/6198/6199/10000/5602/56924	17
hsa04610	Complement and coagulation cascades	17/1172	86/8378	0.0855001	0.244077	0.179231	7035/3075/715/1604/3080/10544/716/966/7450/5055/2243/718/2153/1675/2158/5104/5265	17
hsa04657	IL-17 signaling pathway	17/1172	94/8378	0.157798	0.372058	0.27321	3576/1147/8717/29110/7187/4318/84818/3569/23765/5601/7186/6885/5602/6426/27190/3627/3326	17
hsa05231	Choline metabolism in cancer	17/1172	98/8378	0.203415	0.432743	0.317772	207/5159/23396/8936/5894/2475/5321/2885/1606/6654/5601/6198/6199/1609/5156/10000/5602	17
hsa04640	Hematopoietic cell lineage	17/1172	99/8378	0.215702	0.450278	0.330648	290/912/3566/960/1604/3678/4311/3554/966/929/3569/915/3108/3590/3570/2811/928	17
hsa01200	Carbon metabolism	17/1172	115/8378	0.443157	0.685479	0.503362	6888/3098/5211/5095/3419/5226/35/7086/5091/8803/2539/48/4594/38/4329/5224/230	17
hsa00190	Oxidative phosphorylation	17/1172	134/8378	0.706502	0.864365	0.634722	4720/8992/506/4728/4726/7384/10975/533/10312/374291/4701/1339/29796/1355/4717/4694/4711	17
hsa04622	RIG-I-like receptor signaling pathway	16/1172	71/8378	0.0336504	0.12488	0.0917023	57506/3576/10010/1147/8717/29110/7187/3443/3439/8737/5601/7186/6885/5602/64343/3627	16
hsa04727	GABAergic synapse	16/1172	89/8378	0.172898	0.390188	0.286523	115/2791/112/2559/57468/10681/108/18/2773/2571/6538/2558/6540/2566/2788/27165	16
hsa04916	Melanogenesis	16/1172	101/8378	0.335799	0.581123	0.426731	115/90993/5894/8325/81029/7474/4286/2033/112/6932/108/2773/801/7306/7855/7481	16
hsa04928	Parathyroid hormone synthesis, secretion and action	16/1172	106/8378	0.412543	0.666373	0.489332	2767/115/90993/369/5894/596/5142/9826/112/1388/3709/1594/108/2773/5744/9368	16
hsa05213	Endometrial cancer	15/1172	58/8378	0.0117293	0.0612122	0.0449494	207/369/5894/572/2885/5728/6654/581/10000/6932/4616/1643/10297/4292/1647	15
hsa05230	Central carbon metabolism in cancer	15/1172	70/8378	0.0574796	0.182087	0.133711	207/5159/3098/5211/5894/2475/6510/5728/5156/2539/10000/9997/2261/5224/27165	15
hsa00562	Inositol phosphate metabolism	15/1172	73/8378	0.0780172	0.229464	0.168501	5289/23396/8821/8776/9562/5298/5305/56623/4952/5728/8867/22908/4329/5333/3632	15
hsa01524	Platinum drug resistance	15/1172	73/8378	0.0780172	0.229464	0.168501	637/207/7155/596/9446/572/7153/356/581/10000/2941/2067/355/4292/7507	15
hsa04520	Adherens junction	15/1172	93/8378	0.31707	0.569362	0.418094	7048/57493/5797/10627/8936/8976/9475/2033/2241/71/6932/6885/10580/1459/10458	15
hsa04066	HIF-1 signaling pathway	15/1172	109/8378	0.569914	0.79313	0.582412	207/3098/5211/596/2475/4055/2033/3569/8569/6198/6199/10000/2872/230/3570	15
hsa04724	Glutamatergic synapse	15/1172	114/8378	0.642771	0.829365	0.60902	5532/115/5533/2791/5321/6505/112/3709/5530/10681/108/2773/2788/27165/22941	15
hsa01212	Fatty acid metabolism	14/1172	57/8378	0.022757	0.0997334	0.0732363	79966/64834/35/1374/34/3032/84869/38/2180/2181/23205/9415/7923/5538	14
hsa04213	Longevity regulating pathway - multiple species	14/1172	62/8378	0.0443468	0.154016	0.113097	115/207/5562/3066/2475/112/6198/6199/5563/10000/108/3305/2308/3306	14
hsa00310	Lysine degradation	14/1172	63/8378	0.0499738	0.164692	0.120937	79813/64324/10919/8085/7468/23067/224/9757/5352/38/223/10157/501/5351	14
hsa05217	Basal cell carcinoma	14/1172	63/8378	0.0499738	0.164692	0.120937	650/8325/81029/7474/2737/581/6932/4616/1643/2736/7855/10297/1647/7481	14
hsa05221	Acute myeloid leukemia	14/1172	67/8378	0.0773606	0.229464	0.168501	207/1147/369/5894/2475/572/2885/929/6654/6198/6199/10000/6932/8864	14
hsa05133	Pertussis	14/1172	76/8378	0.168963	0.386533	0.283839	4615/3576/715/3678/716/929/3569/718/5601/3654/5602/2773/3586/801	14
hsa04146	Peroxisome	14/1172	82/8378	0.251133	0.505291	0.371046	55711/55670/5194/1384/5826/5052/2053/2180/2181/5828/3155/10654/26063/4358	14
hsa01232	Nucleotide metabolism	14/1172	85/8378	0.297	0.548056	0.402449	132/1890/51727/7083/4907/51020/271/9583/159/10201/124583/51292/205/1716	14
hsa04912	GnRH signaling pathway	14/1172	93/8378	0.427821	0.670855	0.492623	2767/115/4313/5894/5321/2885/112/6654/5601/4215/3709/108/5602/801	14
hsa05414	Dilated cardiomyopathy	14/1172	96/8378	0.477723	0.718737	0.527783	7042/3685/3693/115/3678/784/112/6443/71/6444/108/153/70/9254	14
hsa04666	Fc gamma R-mediated phagocytosis	14/1172	97/8378	0.494225	0.727186	0.533988	10096/207/23396/10095/8936/5894/10109/5321/1785/2215/6198/6199/6850/10000	14
hsa04670	Leukocyte transendothelial migration	14/1172	114/8378	0.741236	0.884188	0.649278	2909/4313/10627/83700/4318/5747/4478/9475/6387/5781/71/5010/2773/9076	14
hsa03420	Nucleotide excision repair	13/1172	47/8378	0.0103323	0.0565737	0.0415433	2071/5426/8451/2968/5886/5983/1643/5984/6119/2067/1022/5982/7507	13
hsa03250	Viral life cycle - HIV-1	13/1172	63/8378	0.093756	0.260954	0.191624	4298/25920/4131/1025/27183/2033/79643/22936/5045/5478/80237/85363/5903	13
hsa04924	Renin secretion	13/1172	69/8378	0.159773	0.372058	0.27321	5532/5533/134/112/2982/358/2983/3709/5530/117/2773/153/801	13
hsa05211	Renal cell carcinoma	13/1172	69/8378	0.159773	0.372058	0.27321	7042/207/369/5894/2034/572/2033/2885/6654/10000/5781/2889/56924	13
hsa04137	Mitophagy - animal	13/1172	72/8378	0.199899	0.427989	0.314282	55288/29110/4286/65018/8678/5601/22800/8887/664/5602/81631/1459/9451	13
hsa04623	Cytosolic DNA-sensing pathway	13/1172	75/8378	0.244073	0.497075	0.365013	57506/1147/29110/3443/55718/5434/3439/8737/3569/5435/10622/11277/3627	13
hsa05100	Bacterial invasion of epithelial cells	13/1172	77/8378	0.275407	0.534802	0.392716	9844/867/10096/10095/8936/5747/3678/8976/10109/1785/63916/857/71	13
hsa04721	Synaptic vesicle cycle	13/1172	78/8378	0.291547	0.544746	0.400018	8992/10497/1175/1785/6505/161/533/10312/6571/6538/6540/6809/5864	13
hsa04662	B cell receptor signaling pathway	13/1172	84/8378	0.392869	0.656091	0.481781	5532/207/5533/1147/5894/2885/25780/6654/6850/10000/5530/4772/353514	13
hsa05410	Hypertrophic cardiomyopathy	13/1172	90/8378	0.4965	0.72733	0.534093	7042/3685/3693/5562/3678/784/3569/6443/5563/71/6444/70/9254	13
hsa05032	Morphine addiction	13/1172	91/8378	0.5135	0.739262	0.542856	115/5151/2791/5142/134/112/2559/10681/108/2773/2558/2566/2788	13
hsa04658	Th1 and Th2 cell differentiation	13/1172	92/8378	0.530342	0.755916	0.555085	5532/3566/5533/1147/4854/9794/5601/7297/915/5530/5602/3108/4772	13
hsa04713	Circadian entrainment	13/1172	97/8378	0.611339	0.81683	0.599815	115/2791/112/2982/2983/10681/8864/108/117/2773/8863/801/2788	13
hsa04061	Viral protein interaction with cytokine and cytokine receptor	13/1172	100/8378	0.656615	0.837059	0.61467	7132/3576/6355/8809/4055/6387/3569/5197/3586/2826/3587/3570/3627	13
hsa04725	Cholinergic synapse	13/1172	113/8378	0.815375	0.932655	0.684868	2767/115/207/90993/2791/596/112/10000/3709/10681/108/2773/2788	13
hsa04215	Apoptosis - multiple species	12/1172	32/8378	0.00079982	0.00954071	0.00700594	637/7132/27429/596/8678/5601/581/56616/10018/5602/4804/79444	12
hsa00071	Fatty acid degradation	12/1172	43/8378	0.0125393	0.0625091	0.0459017	125/35/1374/224/34/3032/38/2180/223/2181/23205/501	12
hsa03410	Base excision repair	12/1172	44/8378	0.0151075	0.071591	0.0525707	7374/23583/5426/3980/4350/11284/3146/54840/5983/10038/5984/5982	12
hsa00480	Glutathione metabolism	12/1172	57/8378	0.0928809	0.260691	0.191431	290/2936/2937/6723/9446/2730/5226/2882/26873/2539/2941/4953	12
hsa05120	Epithelial cell signaling in Helicobacter pylori infection	12/1172	70/8378	0.268506	0.527719	0.387515	1445/3576/1147/83700/8992/6868/5601/533/10312/5781/5602/5803	12
hsa03320	PPAR signaling pathway	12/1172	75/8378	0.355009	0.604965	0.444238	79966/1593/123/5465/5360/1374/34/10580/2180/2181/23205/9415	12
hsa04971	Gastric acid secretion	12/1172	76/8378	0.372904	0.625879	0.459596	115/483/112/71/3709/108/4638/2773/2520/801/91807/9992	12
hsa04970	Salivary secretion	12/1172	93/8378	0.664506	0.840475	0.617178	115/483/112/6779/6558/2982/2983/1473/3709/108/153/801	12
hsa04750	Inflammatory mediator regulation of TRP channels	12/1172	98/8378	0.734505	0.881645	0.64741	115/5499/3554/5321/112/5601/3709/5583/108/5602/3269/801	12
hsa04925	Aldosterone synthesis and secretion	12/1172	98/8378	0.734505	0.881645	0.64741	2767/115/90993/23683/483/112/1388/747/3709/108/801/3164	12
hsa00564	Glycerophospholipid metabolism	12/1172	99/8378	0.747286	0.888234	0.652248	56894/2820/9926/10908/5321/11313/1606/1609/5320/23175/81579/1040	12
hsa00410	beta-Alanine metabolism	11/1172	31/8378	0.00221127	0.0184641	0.0135586	1806/8639/55748/35/314/224/18/2571/4329/223/501	11
hsa00330	Arginine and proline metabolism	11/1172	50/8378	0.0814247	0.236486	0.173656	6723/55748/224/1152/2628/5033/4953/79814/223/26/501	11
hsa04720	Long-term potentiation	11/1172	67/8378	0.332334	0.578123	0.424528	5532/5533/6196/369/5894/5499/2033/3709/5530/801/6195	11
hsa04664	Fc epsilon RI signaling pathway	11/1172	68/8378	0.350921	0.602064	0.442108	207/2207/5894/5321/2885/6654/5601/241/6850/10000/5602	11
hsa01230	Biosynthesis of amino acids	11/1172	75/8378	0.482984	0.723393	0.531203	6888/5211/3419/586/7086/5091/48/5224/587/230/1491	11
hsa04911	Insulin secretion	11/1172	86/8378	0.673203	0.8407	0.617344	2767/115/90993/483/112/1388/27345/108/117/885/5864	11
hsa04726	Serotonergic synapse	11/1172	115/8378	0.941045	0.987926	0.725455	2791/369/5894/5321/1557/6571/3709/10681/2773/2788/351	11
hsa04710	Circadian rhythm	10/1172	34/8378	0.015034	0.071591	0.0525707	9575/5562/4862/5563/6097/1628/8864/79365/6500/8863	10
hsa05219	Bladder cancer	10/1172	41/8378	0.052041	0.168754	0.12392	5925/3576/4313/1871/1890/369/4318/5894/2261/7380	10
hsa05134	Legionellosis	10/1172	57/8378	0.269441	0.527719	0.387515	7097/4615/3576/929/3569/718/664/7100/3305/3306	10
hsa04923	Regulation of lipolysis in adipocytes	10/1172	58/8378	0.288129	0.543701	0.399251	115/207/134/112/10000/108/4886/2773/153/5733	10
hsa05416	Viral myocarditis	10/1172	60/8378	0.32648	0.575832	0.422845	637/8672/1604/1981/1982/6443/857/71/6444/3108	10
hsa00140	Steroid hormone biosynthesis	10/1172	62/8378	0.365768	0.620134	0.455377	8644/1645/1545/1646/412/3290/1588/6715/3292/7923	10
hsa04927	Cortisol synthesis and secretion	10/1172	65/8378	0.425509	0.670377	0.492272	2767/115/90993/5151/112/1388/3709/108/5087/3164	10
hsa05321	Inflammatory bowel disease	10/1172	65/8378	0.425509	0.670377	0.492272	7042/7097/3566/8809/3569/6097/3108/4772/7100/3586	10
hsa04918	Thyroid hormone synthesis	10/1172	75/8378	0.616096	0.81683	0.599815	2936/115/90993/483/112/1388/2882/4036/3709/108	10
hsa04612	Antigen processing and presentation	10/1172	78/8378	0.666844	0.840475	0.617178	1520/10197/5720/3824/4801/3108/5994/3305/3306/3326	10
hsa04514	Cell adhesion molecules	10/1172	157/8378	0.999246	1	0.734321	3685/5797/214/83700/9019/5802/5010/3108/4685/9076	10
hsa04216	Ferroptosis	9/1172	41/8378	0.109793	0.288748	0.212034	23657/2937/7419/2512/2730/4891/2180/2181/81631	9
hsa04962	Vasopressin-regulated water reabsorption	9/1172	44/8378	0.152984	0.372042	0.273198	1778/115/90993/6810/1783/112/397/10540/396	9
hsa00520	Amino sugar and nucleotide sugar metabolism	9/1172	49/8378	0.24001	0.491801	0.361139	3098/7358/5973/6675/10007/5372/2582/2762/2584	9
hsa04913	Ovarian steroidogenesis	9/1172	51/8378	0.278911	0.535736	0.393402	8644/1545/115/5321/1588/112/2492/108/3292	9
hsa00270	Cysteine and methionine metabolism	9/1172	52/8378	0.298995	0.548705	0.402925	2937/55256/6723/586/23743/2730/4507/587/1491	9
hsa00600	Sphingolipid metabolism	9/1172	53/8378	0.319415	0.570507	0.418935	2583/64781/8560/29956/2717/259230/253782/4758/4759	9
hsa00240	Pyrimidine metabolism	9/1172	58/8378	0.424276	0.670377	0.492272	1806/1890/51727/7083/4907/51020/9583/10201/124583	9
hsa04330	Notch signaling pathway	9/1172	59/8378	0.445356	0.685479	0.503362	3066/4854/6868/9794/1487/2033/113878/4855/7088	9
hsa04370	VEGF signaling pathway	9/1172	59/8378	0.445356	0.685479	0.503362	5532/207/5533/5747/5894/572/5321/10000/5530	9
hsa04730	Long-term depression	9/1172	60/8378	0.466334	0.708777	0.52047	2767/369/5894/5519/5321/2982/2983/3709/2773	9
hsa04978	Mineral absorption	9/1172	60/8378	0.466334	0.708777	0.52047	2512/483/3163/4891/4495/4494/1181/7779/4501	9
hsa00590	Arachidonic acid metabolism	9/1172	61/8378	0.487156	0.726214	0.533274	8644/9536/5321/1557/80142/5320/2053/81579/5740	9
hsa00561	Glycerolipid metabolism	9/1172	62/8378	0.507769	0.734177	0.539121	231/56894/1606/2717/224/1609/223/23175/501	9
hsa00010	Glycolysis / Gluconeogenesis	9/1172	67/8378	0.606161	0.81683	0.599815	3098/5211/9562/125/224/5224/223/230/501	9
hsa05031	Amphetamine addiction	9/1172	69/8378	0.642662	0.829365	0.60902	5532/3066/5533/90993/5499/1388/6571/5530/801	9
hsa04917	Prolactin signaling pathway	9/1172	70/8378	0.660189	0.838415	0.615666	207/5894/2885/6654/5601/10000/5602/1154/8651	9
hsa05140	Leishmaniasis	9/1172	77/8378	0.767987	0.896413	0.658255	7042/7097/4615/2215/718/3654/6885/3108/3586	9
hsa05412	Arrhythmogenic right ventricular cardiomyopathy	9/1172	77/8378	0.767987	0.896413	0.658255	3685/3693/3678/784/6443/71/6444/6932/9254	9
hsa03018	RNA degradation	9/1172	79/8378	0.79382	0.914262	0.671361	5211/5394/28960/5073/23016/9924/22894/80153/1656	9
hsa04260	Cardiac muscle contraction	9/1172	87/8378	0.876041	0.975325	0.716202	483/444/784/7384/10975/70/1339/9254/29796	9
hsa05323	Rheumatoid arthritis	9/1172	93/8378	0.9183	0.984462	0.722911	7042/7097/3576/8992/6387/3569/533/10312/3108	9
hsa05150	Staphylococcus aureus infection	9/1172	96/8378	0.934355	0.984462	0.722911	3075/715/716/2215/718/1675/3108/3586/25984	9
hsa04972	Pancreatic secretion	9/1172	102/8378	0.958423	0.997238	0.732293	115/483/112/6558/5320/3709/108/885/81579	9
hsa03010	Ribosome	9/1172	167/8378	0.999909	1	0.734321	10573/9349/9801/63875/51021/64960/63931/6138/6135	9
hsa04740	Olfactory transduction	9/1172	439/8378	1	1	0.734321	26211/4994/26707/26538/2774/83988/801/26529/2788	9
hsa04392	Hippo signaling pathway - multiple species	8/1172	29/8378	0.0408781	0.144475	0.106091	6788/79633/4771/10413/25937/55233/60485/7003	8
hsa01250	Biosynthesis of nucleotide sugars	8/1172	37/8378	0.136024	0.344181	0.252739	3098/7358/6675/23483/5372/2582/2762/2584	8
hsa00260	Glycine, serine and threonine metabolism	8/1172	40/8378	0.187927	0.410035	0.301097	8639/211/314/2628/23464/5224/1491/501	8
hsa00510	N-Glycan biosynthesis	8/1172	50/8378	0.400051	0.664762	0.488149	1798/4122/4121/4245/23193/6184/11282/8813	8
hsa04340	Hedgehog signaling pathway	8/1172	56/8378	0.532976	0.755916	0.555085	1455/23295/23432/596/2737/23288/4036/2736	8
hsa00534	Glycosaminoglycan biosynthesis - heparan sulfate / heparin	7/1172	24/8378	0.0410933	0.144475	0.106091	2137/11285/9956/2132/2131/64132/9957	7
hsa00650	Butanoate metabolism	7/1172	27/8378	0.0728178	0.22313	0.163849	35/65985/18/38/2571/6296/3155	7
hsa00640	Propanoate metabolism	7/1172	32/8378	0.150312	0.369149	0.271074	5095/35/8803/4594/18/4329/594	7
hsa03020	RNA polymerase	7/1172	34/8378	0.189058	0.410035	0.301097	55718/5434/5435/10622/5432/27297/5433	7
hsa03030	DNA replication	7/1172	36/8378	0.231351	0.479946	0.352434	5426/79621/4171/5983/5984/6119/5982	7
hsa00380	Tryptophan metabolism	7/1172	42/8378	0.3717	0.625879	0.459596	1545/8942/224/38/223/26/501	7
hsa00620	Pyruvate metabolism	7/1172	47/8378	0.492185	0.727186	0.533988	125/224/5091/38/223/97/501	7
hsa05110	Vibrio cholerae infection	7/1172	50/8378	0.561163	0.787648	0.578386	115/8992/6558/533/10312/9414/71	7
hsa04979	Cholesterol metabolism	7/1172	51/8378	0.583209	0.798327	0.586228	1593/7419/10948/6646/5360/3988/4036	7
hsa03460	Fanconi anemia pathway	7/1172	54/8378	0.645856	0.829676	0.609248	55215/378708/6119/2067/4292/7398/91442	7
hsa00970	Aminoacyl-tRNA biosynthesis	7/1172	66/8378	0.834814	0.94518	0.694065	55278/7407/4677/4141/7453/2193/55699	7
hsa00980	Metabolism of xenobiotics by cytochrome P450	7/1172	78/8378	0.933523	0.984462	0.722911	1645/1545/9446/125/3290/2941/8574	7
hsa00983	Drug metabolism - other enzymes	7/1172	80/8378	0.943558	0.987926	0.725455	1806/1890/51727/7083/9446/10201/2941	7
hsa00100	Steroid biosynthesis	6/1172	20/8378	0.0502953	0.164692	0.120937	3930/6646/3988/1594/6309/7108	6
hsa00532	Glycosaminoglycan biosynthesis - chondroitin sulfate / dermatan sulfate	6/1172	21/8378	0.0623866	0.194739	0.143001	29940/55501/10090/11285/54480/64132	6
hsa00563	Glycosylphosphatidylinositol (GPI)-anchor biosynthesis	6/1172	26/8378	0.145679	0.36584	0.268644	55650/5283/54872/5279/9488/51227	6
hsa00030	Pentose phosphate pathway	6/1172	30/8378	0.235436	0.485405	0.356443	6888/5211/5226/7086/2539/230	6
hsa00052	Galactose metabolism	6/1172	31/8378	0.260146	0.518981	0.381099	231/3098/5211/2717/2582/2584	6
hsa04136	Autophagy - other	6/1172	32/8378	0.285492	0.541786	0.397844	5289/55062/2475/8678/26100/3476	6
hsa00051	Fructose and mannose metabolism	6/1172	33/8378	0.311335	0.562086	0.412751	231/3098/5211/5372/2762/230	6
hsa04130	SNARE interactions in vesicular transport	6/1172	33/8378	0.311335	0.562086	0.412751	6810/8675/10228/10282/6843/6809	6
hsa05143	African trypanosomiasis	6/1172	37/8378	0.416982	0.666373	0.489332	4615/356/3569/3910/3586/355	6
hsa05216	Thyroid cancer	6/1172	37/8378	0.416982	0.666373	0.489332	581/6932/8030/4616/1643/1647	6
hsa00860	Porphyrin metabolism	6/1172	43/8378	0.569528	0.79313	0.582412	211/1371/3163/645/1355/210	6
hsa02010	ABC transporters	6/1172	45/8378	0.615967	0.81683	0.599815	4363/10257/5826/23460/9619/23457	6
hsa03022	Basal transcription factors	6/1172	45/8378	0.615967	0.81683	0.599815	6878/6874/2071/2968/6882/1022	6
hsa04930	Type II diabetes mellitus	6/1172	46/8378	0.638095	0.829365	0.60902	3098/2475/5601/5590/5602/8651	6
hsa04672	Intestinal immune network for IgA production	6/1172	49/8378	0.699727	0.859224	0.630946	4055/6387/3569/3108/3586/2826	6
hsa05030	Cocaine addiction	6/1172	49/8378	0.699727	0.859224	0.630946	90993/1388/6571/2773/627/8787	6
hsa05144	Malaria	6/1172	50/8378	0.718622	0.869637	0.638593	7042/7097/4615/3576/3569/3586	6
hsa04961	Endocrine and other factor-regulated calcium reabsorption	6/1172	53/8378	0.770271	0.896413	0.658255	115/483/1175/1785/161/112	6
hsa05320	Autoimmune thyroid disease	6/1172	53/8378	0.770271	0.896413	0.658255	3443/3439/356/3108/3586/355	6
hsa04929	GnRH secretion	6/1172	64/8378	0.90006	0.984462	0.722911	2767/207/5894/10000/3709/2852	6
hsa05204	Chemical carcinogenesis - DNA adducts	6/1172	69/8378	0.934194	0.984462	0.722911	1545/1646/9446/3290/1557/2941	6
hsa00982	Drug metabolism - cytochrome P450	6/1172	72/8378	0.949306	0.990838	0.727593	9446/125/1557/2941/2329/2330	6
hsa04976	Bile secretion	6/1172	89/8378	0.989759	1	0.734321	115/10257/483/112/358/108	6
hsa03008	Ribosome biogenesis in eukaryotes	6/1172	164/8378	0.999998	1	0.734321	6949/79631/10607/55131/1736/1459	6
hsa00061	Fatty acid biosynthesis	5/1172	18/8378	0.0953782	0.263275	0.193329	84869/2180/2181/23205/7923	5
hsa00770	Pantothenate and CoA biosynthesis	5/1172	21/8378	0.160175	0.372058	0.27321	1806/586/80347/224/587	5
hsa00340	Histidine metabolism	5/1172	22/8378	0.18492	0.409029	0.300359	55748/224/223/26/501	5
hsa03430	Mismatch repair	5/1172	23/8378	0.21094	0.443108	0.325383	5983/5984/6119/4292/5982	5
hsa01523	Antifolate resistance	5/1172	30/8378	0.412195	0.666373	0.489332	4363/1147/10257/3569/8836	5
hsa00350	Tyrosine metabolism	5/1172	36/8378	0.579882	0.797039	0.585282	2184/8639/125/314/7306	5
hsa00512	Mucin type O-glycan biosynthesis	5/1172	36/8378	0.579882	0.797039	0.585282	6483/29071/2591/51809/6482	5
hsa00760	Nicotinate and nicotinamide metabolism	5/1172	36/8378	0.579882	0.797039	0.585282	65220/4907/23475/23530/55191	5
hsa00250	Alanine, aspartate and glutamate metabolism	5/1172	37/8378	0.605335	0.81683	0.599815	159/18/5471/2571/27165	5
hsa00513	Various types of N-glycan biosynthesis	5/1172	39/8378	0.653475	0.836247	0.614074	4122/4121/4245/6184/11282	5
hsa05332	Graft-versus-host disease	5/1172	42/8378	0.718286	0.869637	0.638593	356/3569/3824/3108/355	5
hsa00603	Glycosphingolipid biosynthesis - globo and isoglobo series	4/1172	15/8378	0.147155	0.366789	0.269341	6483/53947/2717/6482	4
hsa00430	Taurine and hypotaurine metabolism	4/1172	16/8378	0.175719	0.391269	0.287317	84890/2571/2329/2330	4
hsa00450	Selenocompound metabolism	4/1172	17/8378	0.205965	0.435395	0.319719	22929/7296/4141/1491	4
hsa01210	2-Oxocarboxylic acid metabolism	4/1172	19/8378	0.27018	0.527719	0.387515	3419/586/48/587	4
hsa00900	Terpenoid backbone biosynthesis	4/1172	23/8378	0.404782	0.665997	0.489055	3422/38/23590/10654	4
hsa04614	Renin-angiotensin system	4/1172	23/8378	0.404782	0.665997	0.489055	290/2028/4311/10159	4
hsa00592	alpha-Linolenic acid metabolism	4/1172	26/8378	0.502961	0.730386	0.536338	5321/5320/81579/9415	4
hsa00790	Folate biosynthesis	4/1172	26/8378	0.502961	0.730386	0.536338	231/8644/8836/5860	4
hsa00062	Fatty acid elongation	4/1172	27/8378	0.53412	0.755916	0.555085	64834/3032/11332/5538	4
hsa01040	Biosynthesis of unsaturated fatty acids	4/1172	27/8378	0.53412	0.755916	0.555085	79966/64834/11332/9415	4
hsa00020	Citrate cycle (TCA cycle)	4/1172	30/8378	0.621182	0.81683	0.599815	3419/5091/8803/48	4
hsa00053	Ascorbate and aldarate metabolism	4/1172	30/8378	0.621182	0.81683	0.599815	7358/224/223/501	4
hsa00591	Linoleic acid metabolism	4/1172	30/8378	0.621182	0.81683	0.599815	5321/1557/5320/81579	4
hsa00630	Glyoxylate and dicarboxylate metabolism	4/1172	30/8378	0.621182	0.81683	0.599815	5095/48/4594/38	4
hsa05330	Allograft rejection	4/1172	38/8378	0.798355	0.916325	0.672876	356/3108/3586/355	4
hsa03440	Homologous recombination	4/1172	41/8378	0.844677	0.953116	0.699893	29086/5932/5892/6119	4
hsa04940	Type I diabetes mellitus	4/1172	43/8378	0.870302	0.972177	0.71389	356/3108/2571/355	4
hsa04975	Fat digestion and absorption	4/1172	43/8378	0.870302	0.972177	0.71389	5320/4547/38/81579	4
hsa00514	Other types of O-glycan biosynthesis	4/1172	47/8378	0.910785	0.984462	0.722911	29071/2591/56983/51809	4
hsa04973	Carbohydrate digestion and absorption	4/1172	47/8378	0.910785	0.984462	0.722911	207/3098/483/10000	4
hsa00830	Retinol metabolism	4/1172	68/8378	0.99001	1	0.734321	56603/125/9249/53630	4
hsa04742	Taste transduction	4/1172	86/8378	0.998754	1	0.734321	112/2559/2558/50834	4
hsa00130	Ubiquinone and other terpenoid-quinone biosynthesis	3/1172	11/8378	0.191054	0.411691	0.302313	1728/2677/51805	3
hsa00533	Glycosaminoglycan biosynthesis - keratan sulfate	3/1172	14/8378	0.310635	0.562086	0.412751	6483/6482/8534	3
hsa00604	Glycosphingolipid biosynthesis - ganglio series	3/1172	15/8378	0.351505	0.602064	0.442108	2583/6483/6482	3
hsa00511	Other glycan degradation	3/1172	18/8378	0.470828	0.711568	0.522519	4126/4758/4759	3
hsa00515	Mannose type O-glycan biosynthesis	3/1172	23/8378	0.64313	0.829365	0.60902	55624/79147/9215	3
hsa04964	Proximal tubule bicarbonate reclamation	3/1172	23/8378	0.64313	0.829365	0.60902	483/358/27165	3
hsa04977	Vitamin digestion and absorption	3/1172	24/8378	0.672416	0.8407	0.617344	4363/8884/686	3
hsa05310	Asthma	3/1172	31/8378	0.828867	0.943658	0.692948	2207/3108/3586	3
hsa00040	Pentose and glucuronate interconversions	3/1172	35/8378	0.885628	0.982723	0.721634	231/7358/51084	3
hsa00500	Starch and sucrose metabolism	3/1172	36/8378	0.896897	0.984462	0.722911	2632/3098/8908	3
hsa05340	Primary immunodeficiency	3/1172	38/8378	0.916482	0.984462	0.722911	7374/915/5994	3
hsa05033	Nicotine addiction	3/1172	40/8378	0.932618	0.984462	0.722911	2559/2558/2566	3
hsa00565	Ether lipid metabolism	3/1172	50/8378	0.978091	1	0.734321	5321/5320/81579	3
hsa00360	Phenylalanine metabolism	2/1172	16/8378	0.677091	0.8407	0.617344	8639/314	2
hsa00910	Nitrogen metabolism	2/1172	17/8378	0.709776	0.865202	0.635336	761/768	2
hsa00531	Glycosaminoglycan degradation	2/1172	19/8378	0.766844	0.896413	0.658255	411/3373	2
hsa00670	One carbon pool by folate	2/1172	20/8378	0.791536	0.914262	0.671361	4522/441024	2
hsa04950	Maturity onset diabetes of the young	2/1172	26/8378	0.896421	0.984462	0.722911	4821/3375	2
hsa04966	Collecting duct acid secretion	2/1172	27/8378	0.908174	0.984462	0.722911	8992/10312	2
hsa04744	Phototransduction	2/1172	29/8378	0.928027	0.984462	0.722911	801/8787	2
hsa04960	Aldosterone-regulated sodium reabsorption	2/1172	37/8378	0.973641	1	0.734321	483/2810	2
hsa00920	Sulfur metabolism	1/1172	10/8378	0.778609	0.902971	0.66307	8991	1
hsa03450	Non-homologous end-joining	1/1172	13/8378	0.85922	0.96626	0.709545	5591	1
hsa00730	Thiamine metabolism	1/1172	15/8378	0.895907	0.984462	0.722911	205	1
hsa00120	Primary bile acid biosynthesis	1/1172	17/8378	0.923039	0.984462	0.722911	1593	1
hsa00220	Arginine biosynthesis	1/1172	22/8378	0.963839	0.999759	0.734144	27165	1
hsa03060	Protein export	1/1172	23/8378	0.968911	1	0.734321	6729	1
hsa00601	Glycosphingolipid biosynthesis - lacto and neolacto series	1/1172	27/8378	0.983018	1	0.734321	53947	1
